# Supplementary material for: The Novel Compound SUL-138 Counteracts Endothelial Cell and Kidney Dysfunction in Sepsis by Preserving Mitochondrial Function
Source: MDPI journal article supplement (doi:10.3390/ijms24076330), 2023-03-28
Supplement: s1 [file s1]

**Supplementary Materials:** The following supporting information can be downloaded at: <https://www.mdpi.com/article/10.3390/ijms24076330/s1>.

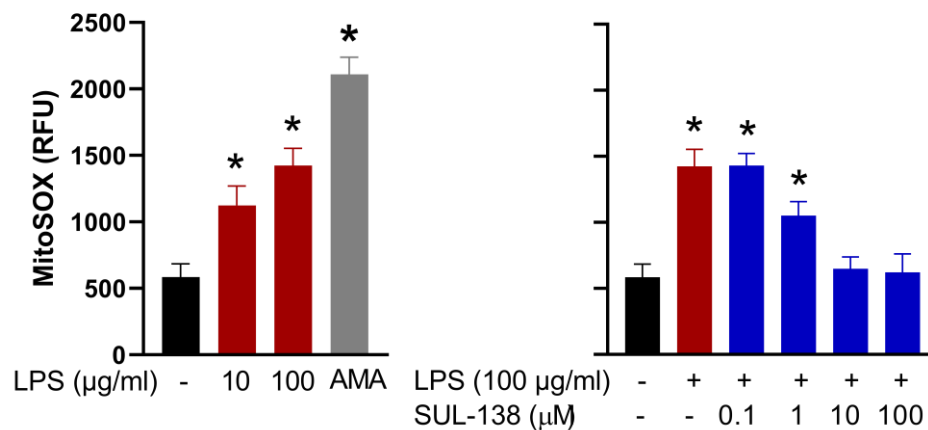

**Figure S1:** Effect of different SUL-138 concentrations on mitochondrial oxidative stress in HUVECs incubated with LPS. HUVECs were incubated without and with SUL-138, followed after 10 min by incubation with LPS (100 µg/mL). A) LPS for 24 h increased mitochondrial oxidative stress, which was inhibited by SUL-138, measured by MitoSOX (n = 8). Differences between groups were determined with an One-way ANOVA test, and a post hoc analyses compared to control. Data are represented as mean ± SEM, \*  $P < 0.05$ .
